# Supplementary material for: An epipodite-bearing crown-group crustacean from the Lower Cambrian
Source: Springer Nature journal article supplement (doi:10.1038/nature06138), 2007-10-03
Supplement: 41586_2007_BFnature06138_MOESM2_ESM.pdf [file 41586_2007_BFnature06138_MOESM2_ESM.pdf]

### Locality and biostratigraphy

All of the fossils illustrated in this study are of 'Orsten'-type preservation<sup>1</sup>. They were obtained by acid digestion techniques from limestone nodules within black shales of the upper portion of the Lower Cambrian Yu'anshan Formation at the Xiaotan section in Yongshan, Yunnan, southern China, where the fossiliferous strata are well exposed along the south bank of the Jinsha River. Co-occurring with these 'Orsten'-type fossils is the trilobite *Eoredlichia* sp.<sup>2</sup>, a typical redlichiid of the *Eoredlichia-Wutingaspis* Biozone, the second trilobite biozone of southern China<sup>3</sup>. The specimens of *Eoredlichia* sp. have been identified from calcitic exoskeletons in the limestone. Also present in the acid residues is the bradoriid arthropod *Kunmingella typica*, previously recorded only from localities in the lower Cambrian Qiongzhusi Formation *Eoredlichia-Wutingaspis* Biozone in Chengjiang County, Yunnan Province, southern China<sup>4</sup>. Below the trilobite-bearing horizon the lower portion of the Yu'anshan Formation and the Dengying Formation have yielded small shelly fossils<sup>5</sup>. Thus, the geological age of the rocks containing *Yicaris* correspond to the upper part of the Lower Cambrian Qiongzhusian, and approximately equal to late Atdabanian Stage of Siberia.

### Justification of phylogenetic assignment of *Yicaris dianensis*

It is well known that DNA sequence data have provided a novel way for phylogenetic analysis. Yet the results are still rather controversial, as exemplified by the suggested affiliation of insects with each major eucrustacean taxon, e.g. insects and malacostracans<sup>6-8</sup>; insects, malacostracans and remipedes<sup>9,10</sup>; insects and branchiopods<sup>11-14</sup>; insects and ostracods<sup>15</sup>. It has been suggested that the Cambrian 'Orsten' *Rehbachiella* represents the sister taxon of the Branchiopoda<sup>16,17</sup>, having the same type of specific feeding apparatus as the living representatives. Many details of this apparatus are, in a general sense, indeed also common to *Y. dianensis* and Branchiopoda and also living cephalocarids. Very similar limbs are also present in two more 'Orsten' species, *Dala peilertae* Müller, 1983, a putative stem-lineage derivative of Maxillopoda<sup>18</sup> and *Waloszekia quinquespinosa* Müller, 1983<sup>19</sup>. The characters they have in common, such as the specific design of the fourth head limb (recognizable as a mouthpart), the shape of the post-mandibular limbs, and the possession of labrophoran features (labrum, sternum, paragnaths etc.<sup>20,21</sup>) argues for their eucrustacean membership. Having the same set of characters *Y. dianensis* is also assigned to the Eucrustacea rather than into the stem-group of either labrophorans or eucrustaceans.

Within Eucrustacea Malacostraca have accumulated a large set of autapomorphies in their evolutionary lineage, and they can be readily distinguished as a monophylum<sup>22</sup>. None of these characters is present in any of the known larval stages of *Y. dianensis*. However, as given above *Y. dianensis* shares many features with cephalocarids, branchiopods and, using *D. peilertae* as a data platform for ancestral maxillopod shape, also with Maxillopoda. This not only makes an affiliation of *Y. dianensis* with the one or other of these taxa more plausible, but – since these features are lacking in Malacostracans, or their features exhibit the plesiomorphic state by comparison – also gives further support for a monophyletic origin of this taxon set, namely the Entomostraca. Less parsimonious at present is the option that these taxa represent a paraphyletic assemblage, as this would cause many character conflicts and reversals to be hypothesized if one tries to sequence them on the evolutionary lineage toward the Malacostraca.

The question of the phylogenetic position of insects (and possibly myriapods) as either sister taxon of one of the major eucrustacean groups or as sister taxon to the Eucrustacea as a whole is independent to the question of the systematic position of *Yicaris* or the possible monophyly of Entomostraca<sup>21</sup>. The phylogenetic position of insects, as tentatively

indicated in Figure 3 (for a detailed discussion of the crustacean characters see Ref. 20), is based on the assumption that in insects structures such as the labrum, the hypopharynx<sup>23</sup>, the specific shape of the mandibular coxa as a specialised mouth part and the maxillula as an additional mouth part are homologous to corresponding structures of Eucrustacea. Autapomorphies that characterise the Entomostraca on the one hand and the Malacostraca on the other hand are not present in insects. Most of them would have to be interpreted *a posteriori* as lost, which is weak evidence. This also holds true for the developmental pattern of crustaceans and particularly the (ortho)nauplius as a specific hatching stage of Eucrustacea. In our view, the best – and least conflicting – solution, at present, is that insects (or ateloceratans) within the crustacean system are most parsimoniously placed above the Phosphatocopina and below the Eucrustacea (Malacostraca + Entomostraca).

1. Maas, A., Braun, A., Dong Xiping, Donoghue, P. J. C., Müller, K. J., Olempska, E., Repetski, J. E., Siveter, D. J., Stein, M. & Waloszek, D. The 'Orsten' - more than a Cambrian Konservat-Lagerstätte yielding exceptional preservation. *Palaeoworld* **15**, 266-282.
2. Luo, H.-L. et al. *The Sinian-Cambrian boundary in eastern Yunnan, China*. 265 pp (Yunnan People's Publishing, Kunming, 1982).
3. Zhang, W.-T. Cambrian biostratigraphy of China. in *Biostratigraphy of China* (eds Zhang, W.-T., Chen, P.-J. & Palmer, A. R.) 55-119 (Sci. Press, Beijing, 2003).
4. Hou X-G., Siveter, D. J., Williams M. & Feng X-H. A Monograph of Bradoriid arthropods from the Lower Cambrian of southwest China. *Trans. Roy. Soc. Edinb.: Earth Sci.* **92**, 347-409 (2002).
5. Li, G.-X., Zhang, J.-M. & Zhu, M.-Y. Litho- and biostratigraphy of the Lower Cambrian Meishucunian Stage in the Xiaotan section, eastern Yunnan. *Acta Palaeont. Sin.* **40** (Supp.), 40-53 (2001).
6. Dohle, W. Are the insects terrestrial crustaceans? A discussion of some new facts and arguments and the proposa of the proper name "Tetraconata" for the monophyletic unit Crustacea + Hexapoda. *Ann. Soc. Entomol. Fr. (N.S.)* **37**, 85-103 (2001).
7. Richter, S. The Tetraconata concept: hexapod-crustacean relationships and the phylogeny of Crustacea. *Org. Divers. Evol.* **2**, 217-237 (2002).
8. Bitsch, C. & Bitsch, J. Phylogenetic relationships of basal hexapods among the mandibulate arthropods: a cladistic analysis based on comparative morphological characters. *Zoologica Scr.* **33**, 511-550 (2004).
9. Fanenbruck, M. & Harzsch, S. A brain atlas of *Godzillioognomus frondosus* Yager, 1989 (Remipedia, Godzillidae) and comparison with the brain of *Speleonectes tulumensis* Yager, 1987 (Remipedia, Speleonectidae): implications for arthropod relationships. *Arthropod Struct. & Devel.* **34**, 343-378 (2005).
10. Harzsch, S. Neurophylogeny: Architecture of the nervous system and a fresh view on arthropod phylogeny. *Integ. Comp. Biol.* **46**, 1-33 (2006).
11. Regier, J. C. & Shultz, J. W. Molecular phylogeny of the major arthropod groups indicates polyphyly of crustaceans and a new hypothesis for the origin of hexapods. *Mol. Biol. Evol.* **14**, 902-913 (1997).
12. Regier, J. C., Shultz, J. W. & Kambic, R. E. Pancrustacean phylogeny: hexapods are terrestrial crustaceans and maxillopods are not monophyletic. *Proc. R. Soc. B* **272**, 395-401 (2005).
13. Mallatt, J. & Giribet, G. Further use of nearly complete 28S and 18S rRNA genes to classify Ecdysozoa: 37 more arthropods and a kinorhynch. *Mol. Phyl. Evol.* **40**, 772-794 (2006).
14. Glenner, H., Thomsen, P. F., Hebsgaard, M. B., Sørensen, M. V. & Willerslev, E. The Origin of Insects. *Science* **314**, 1883-1884 (2006).
15. Newman, W. A. Origin of the Ostracoda and their maxillopodan and hexapodan affinities. *Hydrobiologia* **538**, 1-21 (2005).
16. Schram, F. R. & Koenemann, S. Developmental genetics and arthropod evolution: part I, on legs. *Evol. & Dev.* **3**, 343-354 (2001).
17. Olesen, J. Monophyly and phylogeny of Branchiopoda, with focus on morphology and homologies of branchiopod phylopodous limbs. *J. Crust. Biol.* **27**, 165-183 (2007).
18. Waloszek, D. & Müller, K. J. Early arthropod phylogeny in the light of the Cambrian "Orsten" fossils. In *Arthropod Fossils and Phylogeny* (ed. Edgecombe, G. D.), 185-231 (Columbia University Press, New York, 1998).
19. Müller, K. J. Crustacea with preserved soft parts from the Upper Cambrian of Sweden. *Lethaia* **16**(2), 93-109 (1983).
20. Siveter, D. J., Waloszek, D. & Williams, M. An early Cambrian phosphatocopid crustacean with three-dimensionally preserved soft parts from Shropshire, England. *Spec. Pap. Palaeont.* **70**, 9-30 (2003).
21. Waloszek, D. in *The New Panorama of Animal Evolution* (eds Legakis, A., Sfenthourakis, S., Polymeni, R. & Thessalou-Legaki, M.), Proc. 18th Int. Congr. Zoology, 69-87 (Pensoft Publishers, Sofia, Moscow, 2003).
22. Richter, S. & Scholtz, G. Phylogenetic analysis of the Malacostraca (Crustacea). *J. Zool. Syst. Evol. Res.* **39**, 113-136 (2001).
23. Wolff, C. & Scholtz, G. Cell lineage analysis of the mandibular segment of the amphipod *Orchestia cavimana* reveals that the crustacean paragnaths are sternal outgrowths and not limbs. *Frontiers in Zoology* **3**, 1-14 (2006).
